# Supplementary material for: Investigation of the full reversal of selectivity in the reaction of aniline with 1,3-dichloro-1,3-bis(dimethylamino)vinamidinium salts
Source: Royal Society of Chemistry journal article supplement (doi:10.1039/c7nj03442c), 2017-01-01
Supplement: c7nj03442c1.pdf [file c7nj03442c1.pdf]

## Supporting Information

### DFT CALCULATIONS

**General considerations:** The DFT calculations were carried at the B3LYP/6-311g\*\* level of theory, unless otherwise stated, using the program package Gaussian09.<sup>[1]</sup> Optimized structures were identified as energy minima by calculating the vibrational frequencies. E is the absolute electronic energy with zero point energy correction; H and G are the sum of electronic(in hartrees). Transition states were examined by vibrational analysis and then submitted to intrinsic reaction coordinate calculations.

---

[1] *Gaussian 09, Revision 4.2.0*, M. J. Frisch, G. W. Trucks, H. B. Schlegel, G. E. Scuseria, M. A. Robb, J. R. Cheeseman, G. Scalmani, V. Barone, B. Mennucci, G. A. Petersson, H. Nakatsuji, M. Caricato, X. Li, H. P. Hratchian, A. F. Izmaylov, J. Bloino, G. Zheng, J. L. Sonnenberg, M. Hada, M. Ehara, K. Toyota, R. Fukuda, J. Hasegawa, M. Ishida, T. Nakajima, Y. Honda, O. Kitao, H. Nakai, T. Vreven, J. A. Montgomery, Jr., J. E. Peralta, F. Ogliaro, M. Bearpark, J. J. Heyd, E. Brothers, K. N. Kudin, V. N.; Staroverov, R. Kobayashi, J. Normand, K., Raghavachari, A. Rendell, J. C. Burant, S. S. Iyengar, J. Tomasi, M. Cossi, N. Rega, J. M. Millam, M. Klene, J. E. Knox, J. B. Cross, V. Bakken, C. Adamo, J. Jaramillo, R. Gomperts, R. E. Stratmann, O. Yazyev, A. J. Austin, R. Cammi, C. Pomelli, J. W. Ochterski, R. L. Martin, K. Morokuma, V. G. Zakrzewski, G. A. Voth, P. Salvador, J. J. Dannenberg, S. Dapprich, A. D. Daniels, Ö. Farkas, J. B. Foresman, J. V. Ortiz, J. Cioslowski, D. J. Fox, Gaussian, Inc., Wallingford CT, **2009**.

**Cartesians coordinates for the optimized structure of (1E-3Z)-4**  
(E = -1130.533263; H = -1130.514037; G = -1130.580359)

| atom | x           | y           | z           | atom | x           | y           | z           |
|------|-------------|-------------|-------------|------|-------------|-------------|-------------|
| C    | -4.49120500 | -1.17238400 | 0.10249700  | H    | 2.13742700  | 1.86652300  | -0.43073400 |
| C    | -3.83176800 | -1.49078800 | -1.08505400 | C    | -1.64932000 | 2.53812100  | -0.64474800 |
| C    | -2.50126800 | -1.13530500 | -1.27274600 | H    | -1.51958400 | 3.52531700  | -1.10312100 |
| C    | -1.79445000 | -0.42583100 | -0.28488400 | H    | -1.90006400 | 1.82648400  | -1.42734900 |
| C    | -2.46886500 | -0.11651600 | 0.91287900  | H    | -2.49243800 | 2.58674100  | 0.05416400  |
| C    | -3.79632400 | -0.49053600 | 1.09995200  | C    | 0.24714800  | 3.22849300  | 0.74359300  |
| H    | -5.52579700 | -1.45898800 | 0.25129700  | H    | -0.47852000 | 3.70512200  | 1.41226400  |
| H    | -4.35569800 | -2.02936400 | -1.86773700 | H    | 1.05748900  | 2.83669600  | 1.35508600  |
| H    | -1.97780700 | -1.39864100 | -2.18474700 | H    | 0.64985900  | 4.00540200  | 0.07817400  |
| H    | -1.93857900 | 0.41127400  | 1.69769100  | C    | 1.26055800  | -1.50358200 | 1.59693000  |
| H    | -4.29063600 | -0.24793300 | 2.03509000  | H    | 0.28811800  | -1.79829200 | 1.19549400  |
| N    | -0.43253100 | -0.18515200 | -0.48122700 | H    | 1.61911600  | -2.26721400 | 2.29355800  |
| C    | 0.18756200  | 0.91560800  | -0.19185400 | H    | 1.14627300  | -0.56245000 | 2.13398700  |
| C    | 1.65893900  | 0.93014200  | -0.18178100 | C    | 2.70847100  | -2.58855100 | -0.07191500 |
| C    | 2.47289100  | -0.13997400 | -0.02863500 | H    | 1.88788700  | -3.05494900 | -0.63000800 |
| N    | -0.40651400 | 2.15621700  | 0.00934500  | H    | 3.53273300  | -2.39538400 | -0.75350400 |
| N    | 2.25950100  | -1.34492600 | 0.54709800  | H    | 3.04784300  | -3.28122600 | 0.70269100  |
| Cl   | 4.18558700  | 0.12085500  | -0.55907200 |      |             |             |             |

**Cartesians coordinates for the optimized structure of (1Z-3Z)-4**  
(E = -1130.530154; H = -1130.510858; G = -1130.578189)

| atom | x           | y           | z           | atom | x           | y           | z           |
|------|-------------|-------------|-------------|------|-------------|-------------|-------------|
| C    | 4.67006000  | -1.10929100 | -0.16121100 | C    | 1.71359200  | 2.54331100  | 0.24156500  |
| C    | 4.15947000  | -1.19923300 | 1.13435600  | H    | 1.62746800  | 3.61113900  | 0.47097200  |
| C    | 2.83411800  | -0.87427500 | 1.39714900  | H    | 2.06759600  | 2.02621900  | 1.13048100  |
| C    | 1.98438000  | -0.42233600 | 0.37155300  | H    | 2.46501300  | 2.41623800  | -0.54735700 |
| C    | 2.50669200  | -0.34572100 | -0.93407200 | C    | -0.32584300 | 2.89686900  | -1.06844000 |
| C    | 3.83055800  | -0.68925800 | -1.19150200 | H    | 0.27407200  | 3.08035800  | -1.96976700 |
| H    | 5.70067000  | -1.37534800 | -0.36588200 | H    | -1.25273000 | 2.41657000  | -1.37430700 |
| H    | 4.79666100  | -1.53707500 | 1.94501300  | H    | -0.56119000 | 3.87032700  | -0.61875300 |
| H    | 2.42544200  | -0.96708900 | 2.39684000  | C    | -4.17986300 | 0.39652000  | 1.38024200  |
| H    | 1.85518300  | -0.03849200 | -1.74462000 | H    | -4.41063000 | 1.38808100  | 0.96146700  |
| H    | 4.20712500  | -0.63197700 | -2.20771200 | H    | -5.10587700 | -0.02932700 | 1.77137200  |
| N    | 0.63848200  | -0.20203000 | 0.65472800  | H    | -3.47474700 | 0.51882800  | 2.20259800  |
| C    | -0.06824200 | 0.79935000  | 0.25736100  | C    | -4.61501700 | -1.05297100 | -0.54727100 |
| C    | -1.54042300 | 0.70146300  | 0.33847600  | H    | -5.02108000 | -0.26531700 | -1.19870900 |
| C    | -2.31189400 | -0.36430700 | 0.03333000  | H    | -4.16617300 | -1.82279800 | -1.16847300 |
| N    | 0.40290000  | 2.04536000  | -0.14156800 | H    | -5.43900300 | -1.49766300 | 0.01442800  |
| N    | -3.63040400 | -0.52162400 | 0.39324800  | Cl   | -1.63277200 | -1.74541600 | -0.83951200 |
| H    | -2.05304900 | 1.57671600  | 0.72003600  |      |             |             |             |

**Cartesians coordinates for the optimized structure of (1Z-3E)-4**  
(E = -1130.538214; H = -1130.518897; G = -1130.586185)

| atom | x           | y           | z           | atom | x          | y           | z           |
|------|-------------|-------------|-------------|------|------------|-------------|-------------|
| C    | -4.02576400 | 0.47952100  | 0.15381000  | C    | 1.39612800 | -3.67873600 | 0.15430200  |
| C    | -3.59706600 | -0.07424100 | -1.05244500 | H    | 2.15077800 | -4.31472200 | 0.62360700  |
| C    | -2.40518300 | -0.78652700 | -1.12028400 | H    | 0.41314000 | -3.90744300 | 0.55984700  |
| C    | -1.59718900 | -0.94511800 | 0.01680100  | H    | 1.37154700 | -3.89308000 | -0.92260600 |
| C    | -2.04364400 | -0.39468300 | 1.23054900  | C    | 3.12785000 | -1.94196000 | 0.25404300  |
| C    | -3.24472000 | 0.30662400  | 1.29479300  | H    | 3.46646300 | -2.12478300 | -0.77582700 |
| H    | -4.96082600 | 1.02539900  | 0.20611100  | H    | 3.29002400 | -0.89113500 | 0.48303900  |
| H    | -4.19960800 | 0.04340700  | -1.94692400 | H    | 3.74178100 | -2.54710700 | 0.92749800  |
| H    | -2.07539700 | -1.23202400 | -2.05128300 | C    | 0.90404600 | 2.71529800  | 1.72281300  |
| H    | -1.45531200 | -0.55025300 | 2.12792000  | H    | 1.78059000 | 2.47343600  | 2.34412100  |
| H    | -3.57524700 | 0.71330700  | 2.24513000  | H    | 0.68746700 | 3.77862600  | 1.84330400  |
| N    | -0.44833700 | -1.73601200 | -0.07656000 | H    | 0.04845000 | 2.14079700  | 2.07770700  |
| C    | 0.72064500  | -1.34435500 | 0.29631800  | C    | 2.00307600 | 3.39328900  | -0.36380200 |
| C    | 1.08452400  | 0.04646500  | 0.68960000  | H    | 3.03069600 | 3.33986200  | 0.02537300  |
| C    | 1.05929000  | 1.13264700  | -0.10101100 | H    | 2.02405900 | 3.19582900  | -1.43261200 |
| N    | 1.72366500  | -2.28594100 | 0.42498100  | H    | 1.62502500 | 4.40568700  | -0.20749900 |
| N    | 1.11792000  | 2.44481300  | 0.30822400  | Cl   | 0.83666200 | 0.92608000  | -1.85309600 |
| H    | 1.36842600  | 0.19149700  | 1.72627900  |      |            |             |             |

**Cartesians coordinates for the optimized structure of (1E-3E)-4**  
(E = -1130.540022; H = -1130.520624; G = -1130.587279)

| atom | x           | y           | z           | atom | x           | y           | z           |
|------|-------------|-------------|-------------|------|-------------|-------------|-------------|
| C    | 3.62907200  | -1.31108400 | -0.50374100 | C    | -3.04743700 | -2.51245100 | -0.06180200 |
| C    | 3.08843000  | -1.76370300 | 0.69927300  | H    | -4.01333300 | -2.75378800 | -0.51288000 |
| C    | 1.70966800  | -1.81900700 | 0.87671300  | H    | -2.26666800 | -3.12636600 | -0.50412600 |
| C    | 0.82911000  | -1.40062400 | -0.13703100 | H    | -3.09123800 | -2.74644100 | 1.01068300  |
| C    | 1.38742000  | -0.96868700 | -1.35530200 | C    | -3.87726300 | -0.20507700 | -0.07172800 |
| C    | 2.76664900  | -0.92557500 | -1.52979800 | H    | -4.25180800 | -0.28695300 | 0.95931300  |
| H    | 4.70294800  | -1.27856000 | -0.64726900 | H    | -3.58122400 | 0.82722300  | -0.24300300 |
| H    | 3.74352800  | -2.09119500 | 1.49984600  | H    | -4.70081700 | -0.44970900 | -0.74928000 |
| H    | 1.28598400  | -2.20467700 | 1.79711800  | C    | -0.47271500 | 0.88391500  | 2.23477600  |
| H    | 0.73080400  | -0.68190300 | -2.16740700 | H    | -0.19141000 | -0.17044000 | 2.32056800  |
| H    | 3.17093800  | -0.59334300 | -2.48029800 | H    | -0.21502900 | 1.39793600  | 3.16481400  |
| N    | -0.54117300 | -1.54999600 | 0.07822400  | H    | -1.55126700 | 0.94497000  | 2.08694300  |
| C    | -1.44264400 | -0.68227800 | -0.25521900 | C    | 1.58903200  | 1.95660500  | 1.39206100  |
| C    | -1.21150200 | 0.72063000  | -0.67405400 | H    | 2.21052500  | 1.07556700  | 1.58093100  |
| C    | -0.35287100 | 1.58763900  | -0.09956900 | H    | 1.99229700  | 2.48561000  | 0.53327100  |
| N    | -2.75764500 | -1.10610400 | -0.30102000 | H    | 1.62812900  | 2.61740400  | 2.26343200  |
| N    | 0.20529000  | 1.56046800  | 1.13631100  | Cl   | 0.01332000  | 3.07568700  | -1.04943100 |
| H    | -1.74379300 | 1.05559800  | -1.55442100 |      |             |             |             |

**Cartesians coordinates for the optimized structure of (1Z,2Z,3E)-4•H<sup>+</sup>**

(E = -1130.941440; H = -1130.922097; G = -1130.989174)

| atom | x           | y           | z           | atom | x           | y           | z           |
|------|-------------|-------------|-------------|------|-------------|-------------|-------------|
| C    | -4.22314000 | -1.46462000 | -0.43632600 | H    | -0.09268000 | -0.69477100 | 1.17551400  |
| C    | -4.30159300 | -0.61441600 | 0.66418900  | C    | 0.39414400  | 3.58438600  | -0.33686600 |
| C    | -3.30016000 | 0.32529600  | 0.89574600  | H    | 1.23122300  | 4.11256800  | -0.79352100 |
| C    | -2.22442200 | 0.41620600  | 0.01214300  | H    | -0.34961300 | 3.39053700  | -1.10896700 |
| C    | -2.14820500 | -0.42031200 | -1.10269600 | H    | -0.03439800 | 4.23149700  | 0.43712100  |
| C    | -3.14601400 | -1.36620800 | -1.31620700 | C    | 2.22854200  | 2.40845100  | 0.82062600  |
| H    | -5.00324700 | -2.19484700 | -0.61393500 | H    | 2.26044000  | 3.27921300  | 1.48047800  |
| H    | -5.13967400 | -0.68242300 | 1.34711300  | H    | 2.43739500  | 1.51774700  | 1.40602900  |
| H    | -3.35141300 | 0.98027000  | 1.75852500  | H    | 2.99102200  | 2.52212900  | 0.04780700  |
| H    | -1.32618700 | -0.32021900 | -1.80086200 | C    | 1.61430900  | -2.47732500 | 1.72555300  |
| H    | -3.09164500 | -2.01364300 | -2.18320100 | H    | 0.65102900  | -2.97345500 | 1.56586700  |
| N    | -1.23075300 | 1.42693700  | 0.23576300  | H    | 2.32706100  | -3.21288600 | 2.09562800  |
| H    | -1.58412000 | 2.35784900  | 0.40688800  | H    | 1.49679200  | -1.69290200 | 2.47309900  |
| C    | 0.10611400  | 1.23759700  | 0.32840100  | C    | 2.99581300  | -2.82322500 | -0.29502200 |
| C    | 0.58220300  | -0.08765400 | 0.58793600  | H    | 3.30463600  | -2.36963500 | -1.22973700 |
| C    | 1.67596400  | -0.73041600 | 0.04780800  | H    | 3.88304700  | -3.07147200 | 0.29094100  |
| N    | 0.89325200  | 2.32280000  | 0.22109600  | H    | 2.44478900  | -3.74266500 | -0.51142100 |
| N    | 2.14184200  | -1.91254100 | 0.47842000  | Cl   | 2.51728300  | -0.01234300 | -1.31541300 |

**Cartesians coordinates for the optimized structure of (1E,2E,3E)-4•H<sup>+</sup>**

(E = -1130.936285; H = -1130.917039; G = -1130.982905)

| atom | x           | y           | z           | atom | x           | y           | z           |
|------|-------------|-------------|-------------|------|-------------|-------------|-------------|
| C    | 3.46081200  | -1.65221400 | -0.68071400 | H    | -1.92603200 | 1.23469400  | -1.24207200 |
| C    | 3.02882500  | -2.00814200 | 0.59434700  | C    | -3.15564800 | -2.39014100 | -0.12203900 |
| C    | 1.68563800  | -1.88089900 | 0.93965200  | H    | -4.03166000 | -2.53995100 | -0.75382000 |
| C    | 0.76719700  | -1.40633500 | 0.00067900  | H    | -2.32947700 | -2.95670400 | -0.54996300 |
| C    | 1.19059300  | -1.07255800 | -1.28763000 | H    | -3.38766000 | -2.77232700 | 0.87773700  |
| C    | 2.53804500  | -1.18708800 | -1.61668400 | C    | -3.99836100 | -0.05953300 | -0.16123000 |
| H    | 4.50544200  | -1.75063500 | -0.94911900 | H    | -4.78610200 | -0.45634600 | 0.48169700  |
| H    | 3.73415700  | -2.38752500 | 1.32386600  | H    | -3.72787600 | 0.93301600  | 0.19048700  |
| H    | 1.35158400  | -2.16461200 | 1.93225300  | H    | -4.38286100 | 0.00926000  | -1.18314200 |
| H    | 0.47748000  | -0.74018400 | -2.03082300 | C    | -0.10348600 | 1.06355700  | 2.28477900  |
| H    | 2.86257000  | -0.93130900 | -2.61825400 | H    | 0.28755800  | 0.06582500  | 2.49203000  |
| N    | -0.61486600 | -1.35914400 | 0.37651500  | H    | 0.16094300  | 1.72606800  | 3.11057800  |
| H    | -0.93185100 | -2.15446700 | 0.91259500  | H    | -1.18810500 | 1.02179800  | 2.20129100  |
| C    | -1.57711600 | -0.49140400 | -0.03899400 | C    | 1.77480500  | 2.27769500  | 1.21476300  |
| C    | -1.29291200 | 0.83992400  | -0.46122400 | H    | 2.31781600  | 2.28730600  | 0.27431300  |
| C    | -0.23038900 | 1.64232400  | -0.08270100 | H    | 1.64922500  | 3.30228900  | 1.57513000  |
| N    | -2.83963700 | -0.95731000 | -0.09633300 | H    | 2.35068500  | 1.70779100  | 1.94314200  |
| N    | 0.46766600  | 1.62011500  | 1.05409900  | Cl   | 0.19847100  | 2.90525100  | -1.22505400 |

**Cartesians coordinates for the optimized structure of (1Z,2E,3E)-4·H<sup>+</sup>**

(E = -1130.939942; H = -1130.920414; G = -1130.987966)

| atom | x           | y           | z           | atom | x          | y           | z           |
|------|-------------|-------------|-------------|------|------------|-------------|-------------|
| C    | -3.97751600 | -0.11461700 | 0.62907900  | H    | 2.09574800 | 0.30044300  | 1.17176500  |
| C    | -3.71587000 | -0.62153400 | -0.64132100 | C    | 1.75704000 | -3.55240300 | 0.15874400  |
| C    | -2.44351000 | -1.08554600 | -0.96250200 | H    | 2.52368700 | -4.03639500 | 0.76445200  |
| C    | -1.43228200 | -1.05250000 | -0.00168900 | H    | 0.78963700 | -3.72919100 | 0.62746000  |
| C    | -1.69321100 | -0.56702200 | 1.28062300  | H    | 1.77264500 | -4.00746400 | -0.83749400 |
| C    | -2.96413600 | -0.08962100 | 1.58594600  | C    | 3.46963300 | -1.76380100 | 0.08850300  |
| H    | -4.96768600 | 0.24777500  | 0.87664200  | H    | 3.99405700 | -2.45195400 | -0.57726100 |
| H    | -4.49994100 | -0.65316800 | -1.38807300 | H    | 3.60299600 | -0.75138100 | -0.28378800 |
| H    | -2.23505200 | -1.46618800 | -1.95642400 | H    | 3.90428900 | -1.84748500 | 1.08893900  |
| H    | -0.91842500 | -0.58042000 | 2.03684600  | C    | 1.44810300 | 2.68739700  | 1.71612000  |
| H    | -3.16850300 | 0.28094100  | 2.58342700  | H    | 2.53845900 | 2.63631400  | 1.80670400  |
| N    | -0.15663400 | -1.60609200 | -0.34193300 | H    | 1.11544500 | 3.65848700  | 2.08026500  |
| H    | -0.19691500 | -2.45561700 | -0.88758900 | H    | 0.99536200 | 1.90930000  | 2.32968800  |
| C    | 1.07509200  | -1.18424300 | 0.03034100  | C    | 0.88040700 | 3.81063900  | -0.41456900 |
| C    | 1.36866200  | 0.17053200  | 0.38280200  | H    | 0.78398700 | 3.63398200  | -1.47996200 |
| C    | 0.89070000  | 1.32404200  | -0.21154000 | H    | 0.00074800 | 4.35293300  | -0.05951200 |
| N    | 2.04539300  | -2.11511400 | 0.10465800  | H    | 1.76963300 | 4.41931100  | -0.23720900 |
| N    | 1.01738400  | 2.54607900  | 0.32094800  | Cl   | 0.10459700 | 1.23516100  | -1.76987200 |

**Cartesians coordinates for the optimized structure of (1E,2Z,3E)-4·H<sup>+</sup>**

(E = -1130.935112; H = -1130.915861; G = -1130.982326)

| atom | x           | y           | z           | atom | x           | y           | z           |
|------|-------------|-------------|-------------|------|-------------|-------------|-------------|
| C    | 4.44731400  | -1.30679800 | 0.39297900  | H    | 0.29127600  | -0.87840100 | -1.10848700 |
| C    | 4.41852800  | -0.47718000 | -0.72572300 | C    | -0.56747600 | 3.40759800  | 0.22860400  |
| C    | 3.34687400  | 0.38867600  | -0.92794500 | H    | -1.45610200 | 3.91193800  | 0.60777700  |
| C    | 2.30873600  | 0.42633500  | 0.00314100  | H    | 0.14535500  | 3.31112300  | 1.04722700  |
| C    | 2.33990300  | -0.38926400 | 1.13452600  | H    | -0.13707200 | 4.03242300  | -0.56288000 |
| C    | 3.40738700  | -1.26213900 | 1.32002900  | C    | -2.25106400 | 2.03749100  | -0.96442000 |
| H    | 5.28074100  | -1.98149300 | 0.54587800  | H    | -2.37341900 | 2.96148900  | -1.53266300 |
| H    | 5.22635600  | -0.50583300 | -1.44671600 | H    | -2.27485500 | 1.20070700  | -1.65767900 |
| H    | 3.31328400  | 1.02508800  | -1.80526600 | H    | -3.08240900 | 1.95041200  | -0.26029200 |
| H    | 1.54728300  | -0.33009600 | 1.87023400  | C    | -2.10961500 | 0.11970100  | 1.89111000  |
| H    | 3.43410300  | -1.89611600 | 2.19801400  | H    | -2.41491000 | 1.16788800  | 1.83578400  |
| N    | 1.23583300  | 1.36157300  | -0.19398700 | H    | -2.58375200 | -0.33561500 | 2.76193100  |
| H    | 1.51747700  | 2.31294600  | -0.38568400 | H    | -1.02962300 | 0.06643400  | 2.01461800  |
| C    | -0.07632900 | 1.06120500  | -0.32438000 | C    | -3.86715000 | -1.20948500 | 0.75059200  |
| C    | -0.44928100 | -0.29282200 | -0.58247600 | H    | -4.25291400 | -1.37744900 | -0.25131200 |
| C    | -1.62220200 | -0.94143100 | -0.25655900 | H    | -3.87006800 | -2.15434300 | 1.30095100  |
| N    | -0.95879700 | 2.08385400  | -0.26935900 | H    | -4.51769800 | -0.49882500 | 1.26014200  |
| N    | -2.51203300 | -0.63625000 | 0.70046700  | Cl   | -1.94540200 | -2.41281400 | -1.16048900 |

**Cartesians coordinates for the optimized structure of (1Z,2E,3Z)-4·H<sup>+</sup>**

(E = -1130.941161; H = -1130.921781; G = -1130.988884)

| atom | x           | y           | z           | atom | x           | y           | z           |
|------|-------------|-------------|-------------|------|-------------|-------------|-------------|
| C    | 4.54082300  | -1.23316000 | -0.29906700 | H    | -2.13714800 | 1.70479100  | 0.34482500  |
| C    | 4.10000900  | -1.33999500 | 1.01859800  | C    | 1.70969500  | 2.60364500  | 0.37597700  |
| C    | 2.82150200  | -0.91523800 | 1.36706700  | H    | 1.61525400  | 3.66811900  | 0.59776500  |
| C    | 1.97601900  | -0.39358100 | 0.38673600  | H    | 1.98156900  | 2.07768400  | 1.28716400  |
| C    | 2.40404600  | -0.30006600 | -0.93889300 | H    | 2.49924700  | 2.46212800  | -0.36597900 |
| C    | 3.69126800  | -0.71272400 | -1.27311700 | C    | -0.29554400 | 3.06949900  | -0.99487200 |
| H    | 5.53822100  | -1.55970000 | -0.56654300 | H    | 0.42527000  | 3.51268800  | -1.68440500 |
| H    | 4.75332400  | -1.74833100 | 1.78010900  | H    | -1.05643900 | 2.55141500  | -1.57375700 |
| H    | 2.48181300  | -0.98302300 | 2.39475900  | H    | -0.75869900 | 3.87429000  | -0.41533000 |
| H    | 1.73432500  | 0.07165300  | -1.70522200 | C    | -4.30339000 | 0.57428500  | 0.95157500  |
| H    | 4.02263600  | -0.64293900 | -2.30229800 | H    | -4.56807100 | 1.42090700  | 0.30953300  |
| N    | 0.64489900  | -0.02108400 | 0.76460300  | H    | -5.21920900 | 0.14488000  | 1.35502000  |
| H    | 0.15532400  | -0.70209900 | 1.32658300  | H    | -3.68623200 | 0.09295700  | 1.77893600  |
| C    | -0.13733500 | 0.96367600  | 0.25816000  | C    | -4.45964600 | -1.52445700 | -0.35591800 |
| C    | -1.55856000 | 0.80209700  | 0.21269800  | H    | -3.93455500 | -2.10351000 | -1.10739400 |
| C    | -2.28127400 | -0.35677400 | -0.01472700 | H    | -4.79693600 | -2.19046700 | 0.44220600  |
| N    | 0.41312600  | 2.12855600  | -0.12183500 | H    | -5.32966600 | -1.05570900 | -0.81960800 |
| N    | -3.59797400 | -0.47013300 | 0.19876300  | Cl   | -1.48153300 | -1.78302100 | -0.65484600 |

**Cartesians coordinates for the optimized structure of (1Z,2Z,3Z)-4·H<sup>+</sup>**

(E = -1130.939122; H = -1130.919878; G = -1130.986407)

| atom | x           | y           | z           | atom | x           | y           | z           |
|------|-------------|-------------|-------------|------|-------------|-------------|-------------|
| C    | -5.17425900 | -0.50877100 | 0.17584500  | H    | 1.12939800  | -1.75380700 | 0.36102400  |
| C    | -4.69189800 | -0.73374500 | -1.11184200 | C    | -1.20961100 | 2.16053000  | -0.17040800 |
| C    | -3.32128900 | -0.76108400 | -1.35256300 | H    | -0.76350200 | 3.14658100  | -0.31274600 |
| C    | -2.43093500 | -0.57631300 | -0.29427400 | H    | -1.53473500 | 1.77905900  | -1.13435100 |
| C    | -2.90656400 | -0.36894700 | 1.00185600  | H    | -2.07540500 | 2.25227100  | 0.48981000  |
| C    | -4.27963900 | -0.32630900 | 1.22854300  | C    | 0.60155700  | 1.90050300  | 1.47958900  |
| H    | -6.24128200 | -0.48311500 | 0.35965000  | H    | -0.08926800 | 2.32177200  | 2.21471600  |
| H    | -5.38172600 | -0.88225800 | -1.93371800 | H    | 1.22619600  | 1.15671700  | 1.96688500  |
| H    | -2.94376100 | -0.92091800 | -2.35657600 | H    | 1.22901100  | 2.70471300  | 1.08980500  |
| H    | -2.21425900 | -0.26441300 | 1.82907700  | C    | 3.53416000  | -2.13050700 | 1.02628200  |
| H    | -4.64924500 | -0.16855600 | 2.23471400  | H    | 3.22046000  | -3.00766300 | 0.45036300  |
| N    | -1.02450400 | -0.67217000 | -0.55736800 | H    | 4.51794100  | -2.32694800 | 1.44986200  |
| H    | -0.74130600 | -1.45940600 | -1.12396000 | H    | 2.82907500  | -1.96009000 | 1.83960900  |
| C    | 0.00051100  | 0.01728500  | 0.00570300  | C    | 4.95344900  | -0.70642300 | -0.41537500 |
| C    | 1.23583400  | -0.69978300 | 0.14303100  | H    | 4.91976100  | 0.09022800  | -1.14975100 |
| C    | 2.51730100  | -0.24971500 | -0.11638500 | H    | 5.66555500  | -0.44146500 | 0.36938900  |
| N    | -0.18236400 | 1.28443900  | 0.40605200  | H    | 5.28875200  | -1.62395700 | -0.90478800 |
| N    | 3.62863700  | -0.93684900 | 0.17757300  | Cl   | 2.74613300  | 1.29488100  | -0.91310800 |

**Cartesians coordinates for the optimized structure of (1E,2E,3Z)-4·H<sup>+</sup>**

(E = -1130.935479; H = -1130.916321; G = -1130.982116)

| atom | x           | y           | z           | atom | x           | y           | z           |
|------|-------------|-------------|-------------|------|-------------|-------------|-------------|
| C    | -4.41947500 | -1.30398800 | 0.16219500  | H    | 2.17998100  | 1.90259800  | -0.33481300 |
| C    | -3.82737500 | -1.56204700 | -1.07243500 | C    | -1.67226500 | 2.61283500  | -0.53307200 |
| C    | -2.53912100 | -1.11014400 | -1.34180300 | H    | -1.57063100 | 3.63960600  | -0.88996700 |
| C    | -1.83256900 | -0.40606300 | -0.36422400 | H    | -1.91502100 | 1.97221100  | -1.37601700 |
| C    | -2.41504600 | -0.15652300 | 0.88097600  | H    | -2.48522300 | 2.56787900  | 0.19513300  |
| C    | -3.71037700 | -0.60088700 | 1.13375100  | C    | 0.26546300  | 3.26261300  | 0.85722800  |
| H    | -5.42469000 | -1.65083000 | 0.36698500  | H    | -0.48727400 | 3.75102100  | 1.47842800  |
| H    | -4.37049800 | -2.10919200 | -1.83342600 | H    | 1.02668300  | 2.83178800  | 1.50335500  |
| H    | -2.08604400 | -1.29592900 | -2.30974700 | H    | 0.72200700  | 4.01698100  | 0.20878800  |
| H    | -1.86320500 | 0.37044300  | 1.65014300  | C    | 2.99485500  | -2.54404900 | 0.25643600  |
| H    | -4.16005300 | -0.40600500 | 2.10004900  | H    | 3.79440000  | -2.60321600 | 0.99984200  |
| N    | -0.48814900 | -0.01380300 | -0.65613400 | H    | 2.35363200  | -3.42012400 | 0.35148500  |
| H    | 0.04543200  | -0.67593600 | -1.20091100 | H    | 3.43004300  | -2.53621900 | -0.73912100 |
| C    | 0.22574400  | 1.05605200  | -0.21125400 | C    | 1.11833700  | -1.50294000 | 1.49494800  |
| C    | 1.65066500  | 0.97910800  | -0.15368800 | H    | 0.85641000  | -0.53124000 | 1.90870000  |
| C    | 2.44672400  | -0.15098200 | -0.05634400 | H    | 0.22319500  | -1.97732000 | 1.08800400  |
| N    | -0.39263300 | 2.21500800  | 0.06846500  | H    | 1.51612700  | -2.13005100 | 2.29484300  |
| N    | 2.16489700  | -1.34719500 | 0.47590700  | Cl   | 4.08897500  | 0.05103300  | -0.64680600 |

**Cartesians coordinates for the optimized structure of (1E,2Z,3Z)-4·H<sup>+</sup>**

(E = -1130.933296; H = -1130.914249; G = -1130.979670)

| atom | x           | y           | z           | atom | x           | y           | z           |
|------|-------------|-------------|-------------|------|-------------|-------------|-------------|
| C    | 5.16157900  | -0.29408400 | -0.25807100 | H    | -0.97747500 | -2.03910100 | 0.12605100  |
| C    | 4.75666800  | -0.23689200 | 1.07396000  | C    | 1.00990100  | 2.08556100  | -0.27446800 |
| C    | 3.40512300  | -0.30829900 | 1.39945700  | H    | 0.51044700  | 3.05293100  | -0.35135700 |
| C    | 2.45871500  | -0.45172100 | 0.38466000  | H    | 1.39749000  | 1.96715800  | 0.73406500  |
| C    | 2.85766200  | -0.52931700 | -0.95071900 | H    | 1.84354700  | 2.06113300  | -0.98029200 |
| C    | 4.21091100  | -0.43952400 | -1.26646200 | C    | -0.84938900 | 1.32029200  | -1.71365800 |
| H    | 6.21352100  | -0.23464800 | -0.50885000 | H    | -0.24483600 | 1.76300700  | -2.50784000 |
| H    | 5.49160800  | -0.13175100 | 1.86273600  | H    | -1.29423500 | 0.39978700  | -2.08330500 |
| H    | 3.08573300  | -0.25182000 | 2.43424200  | H    | -1.64211100 | 2.02606700  | -1.45012800 |
| H    | 2.12403400  | -0.68302400 | -1.73359300 | C    | -2.38657200 | 1.45606600  | 1.40284600  |
| H    | 4.52254700  | -0.50395300 | -2.30209400 | H    | -1.92460500 | 2.30262400  | 0.88945000  |
| N    | 1.07574400  | -0.58867200 | 0.74834400  | H    | -3.12767700 | 1.83825000  | 2.10640700  |
| H    | 0.88172600  | -1.29234700 | 1.44771600  | H    | -1.62640600 | 0.91031300  | 1.95878600  |
| C    | -0.02231100 | -0.13297200 | 0.09281900  | C    | -4.45789700 | 0.91502100  | 0.14677800  |
| C    | -1.17844900 | -0.97673500 | 0.12314700  | H    | -4.74941500 | 0.51231400  | -0.81942700 |
| C    | -2.51347800 | -0.61417800 | 0.11214600  | H    | -5.14191600 | 0.54324500  | 0.91440100  |
| N    | 0.02308400  | 1.03836700  | -0.56994600 | H    | -4.52347500 | 2.00196000  | 0.10697900  |
| N    | -3.06657200 | 0.55257200  | 0.46680500  | Cl   | -3.63288600 | -1.88337300 | -0.35264600 |

### Cartesians coordinates for the optimized structure of *trans*-5

(E = -1130.502907; H = -1130.484726; G = -1130.547267)

| atom | x           | y           | z           | atom | x           | y           | z           |
|------|-------------|-------------|-------------|------|-------------|-------------|-------------|
| C    | 2.93721300  | 1.80187700  | -0.59286200 | C    | -3.90718400 | 1.31974000  | 0.32156100  |
| C    | 2.39803500  | 0.59409500  | -0.82748600 | H    | -4.28384200 | 1.09366200  | 1.33074400  |
| C    | 0.92494300  | 0.34954500  | -0.71851700 | H    | -3.28234000 | 2.20577900  | 0.37008100  |
| C    | 0.11506300  | 1.52053800  | -0.17872000 | H    | -4.76545300 | 1.51822000  | -0.32647200 |
| C    | 0.78311900  | 2.78487900  | 0.03546500  | C    | -3.85753600 | -1.03339700 | -0.38437300 |
| C    | 2.11572700  | 2.91566500  | -0.15829300 | H    | -4.86406600 | -0.81213300 | -0.74445300 |
| H    | 4.00089500  | 1.96217800  | -0.72838400 | H    | -3.35783900 | -1.66605300 | -1.12041300 |
| H    | 3.00772000  | -0.22948000 | -1.17841400 | H    | -3.94774400 | -1.60182900 | 0.55504500  |
| H    | 0.55737000  | 0.23693300  | -1.75211300 | C    | 0.53077000  | -0.65388500 | 2.38118000  |
| H    | 0.16722500  | 3.61004400  | -0.37260200 | H    | 0.76362700  | -1.23159100 | 3.27953300  |
| H    | 2.59384800  | 3.87321300  | 0.01831600  | H    | 1.01244400  | 0.33326700  | 2.48184300  |
| N    | -1.15636700 | 1.42703200  | 0.03497900  | H    | -0.54644500 | -0.51407700 | 2.33468700  |
| C    | -1.75726600 | 0.16998800  | -0.09244000 | C    | 2.43177100  | -1.68061100 | 1.32082800  |
| C    | -1.03991200 | -0.99041400 | -0.03330000 | H    | 2.76183200  | -2.29249900 | 0.48472300  |
| C    | 0.44850700  | -0.98766800 | -0.05254700 | H    | 3.04940400  | -0.77013600 | 1.36394100  |
| N    | -3.13330700 | 0.21125500  | -0.22442200 | H    | 2.60259200  | -2.24661800 | 2.24084100  |
| N    | 1.00374300  | -1.40017400 | 1.21481800  | Cl   | 0.95896800  | -2.34412200 | -1.31862500 |
| H    | -1.50966000 | -1.94770400 | 0.13391500  |      |             |             |             |

### Cartesians coordinates for the optimized structure of *cis*-5

(E = -1130.522610; H = -1130.503839; G = -1130.567986)

| atom | x           | y           | z           | atom | x           | y           | z           |
|------|-------------|-------------|-------------|------|-------------|-------------|-------------|
| C    | -2.99856900 | -1.53826600 | -0.86807300 | C    | 3.81088300  | -1.56556700 | 0.19846700  |
| C    | -2.39007700 | -0.35259100 | -1.04250800 | H    | 4.34197400  | -1.44696300 | 1.14909900  |
| C    | -0.90824900 | -0.21048600 | -0.89813100 | H    | 3.08048000  | -2.36207200 | 0.29088300  |
| C    | -0.20621500 | -1.40742300 | -0.30142400 | H    | 4.53717600  | -1.81914700 | -0.57990900 |
| C    | -0.94264000 | -2.62864800 | -0.13185400 | C    | 3.95384400  | 0.86543800  | -0.22999500 |
| C    | -2.26586500 | -2.69367400 | -0.41173900 | H    | 4.96341500  | 0.56558600  | -0.51303200 |
| H    | -4.06137200 | -1.63439600 | -1.05711400 | H    | 3.57443500  | 1.54767500  | -0.99247600 |
| H    | -2.94582300 | 0.49382200  | -1.42154800 | H    | 4.00948100  | 1.39929300  | 0.72720000  |
| H    | -0.55516300 | -0.21338900 | -1.95631300 | C    | -0.19891700 | 3.50356400  | -0.33898300 |
| H    | -0.39120600 | -3.47944500 | 0.24659900  | H    | -0.88210300 | 4.30872300  | -0.61226600 |
| H    | -2.80162400 | -3.62474100 | -0.26569800 | H    | 0.21046900  | 3.71925200  | 0.65606000  |
| N    | 1.09440600  | -1.42187800 | -0.13253500 | H    | 0.61320300  | 3.48089400  | -1.06644600 |
| C    | 1.76814900  | -0.24759600 | -0.20948800 | C    | -2.30051300 | 2.35687300  | 0.19013900  |
| C    | 1.11391200  | 1.00918400  | -0.24865000 | H    | -2.59076000 | 1.42225800  | 0.66225800  |
| C    | -0.26424100 | 1.07412100  | -0.39315300 | H    | -2.28064900 | 3.10856000  | 0.98267700  |
| N    | 3.12195600  | -0.32450000 | -0.14735600 | H    | -3.01660000 | 2.67349200  | -0.57535900 |
| N    | -0.94055100 | 2.24571800  | -0.36425100 | Cl   | -1.14249600 | -0.14766100 | 2.16965200  |
| H    | 1.65741900  | 1.88586300  | 0.06265200  |      |             |             |             |



### Cartesians coordinates for the optimized structure of *trans*-5-H<sup>+</sup>

(E = -1130.876947; H = -1130.858590; G = -1130.921342)

| atom | x           | y           | z           | atom | x           | y           | z           |
|------|-------------|-------------|-------------|------|-------------|-------------|-------------|
| C    | 2.99021700  | 1.76727800  | -0.58553700 | H    | -1.51997900 | -1.97767100 | 0.07498400  |
| C    | 2.41500000  | 0.56968800  | -0.84866000 | C    | -3.89870900 | 1.34424000  | 0.27283600  |
| C    | 0.95513000  | 0.35656100  | -0.71123700 | H    | -4.94739300 | 1.21014600  | 0.01623900  |
| C    | 0.19574600  | 1.52233700  | -0.19269000 | H    | -3.83121100 | 1.46715200  | 1.36196000  |
| C    | 0.83633300  | 2.75183600  | 0.06013500  | H    | -3.58510000 | 2.26758500  | -0.22293600 |
| C    | 2.19107900  | 2.86270100  | -0.13575300 | C    | -3.88370200 | -1.07947900 | -0.29747100 |
| H    | 4.05386200  | 1.91200500  | -0.72560500 | H    | -4.90886700 | -0.87345400 | -0.59995200 |
| H    | 2.99560000  | -0.25747800 | -1.23687100 | H    | -3.42995900 | -1.72245000 | -1.05302100 |
| H    | 0.56247800  | 0.20786900  | -1.73233000 | H    | -3.89993800 | -1.61466100 | 0.66080300  |
| H    | 0.25684600  | 3.60054000  | 0.40596500  | C    | 0.58596200  | -0.52947200 | 2.32518300  |
| H    | 2.67164900  | 3.81507700  | 0.05786400  | H    | -0.48914000 | -0.36606800 | 2.32088200  |
| N    | -1.12220700 | 1.37031400  | -0.03697400 | H    | 0.84805400  | -1.01435300 | 3.26570100  |
| H    | -1.66519300 | 2.17914300  | 0.23299700  | H    | 1.10465700  | 0.44476600  | 2.29563700  |
| C    | -1.78756800 | 0.11701900  | -0.10735100 | C    | 2.38226900  | -1.81297100 | 1.33174300  |
| C    | -1.04515000 | -1.01757300 | -0.04591400 | H    | 2.61851000  | -2.58372900 | 0.60403700  |
| C    | 0.45309100  | -1.03902600 | -0.05269900 | H    | 3.07639000  | -0.96647300 | 1.19881900  |
| N    | -3.15431100 | 0.18517300  | -0.22337500 | H    | 2.54103500  | -2.22490700 | 2.32860800  |
| N    | 0.98488800  | -1.40014200 | 1.22041200  | Cl   | 0.95593600  | -2.32172300 | -1.29704300 |

### Cartesians coordinates for the optimized structure of *cis*-5-H<sup>+</sup>

(E = -1130.879260; H = -1130.860378; G = -1130.924679)

| atom | x           | y           | z           | atom | x           | y           | z           |
|------|-------------|-------------|-------------|------|-------------|-------------|-------------|
| C    | -2.90646500 | 1.92690000  | 0.51836300  | H    | 1.39793200  | -1.98126200 | -0.25939700 |
| C    | -2.41024900 | 0.69376600  | 0.75288200  | C    | 3.95247800  | 1.25892100  | 0.08620100  |
| C    | -0.95730800 | 0.39712900  | 0.68205500  | H    | 4.98763900  | 1.00977600  | 0.30754500  |
| C    | -0.11515900 | 1.55447600  | 0.28217700  | H    | 3.92781300  | 1.71099300  | -0.91442300 |
| C    | -0.67147600 | 2.83063900  | 0.06410400  | H    | 3.64343700  | 1.99542000  | 0.83331300  |
| C    | -2.02647500 | 3.00190300  | 0.17117400  | C    | 3.82445600  | -1.24983300 | 0.01662800  |
| H    | -3.96863400 | 2.12015300  | 0.59683800  | H    | 4.88433900  | -1.12223800 | 0.22412800  |
| H    | -3.06730900 | -0.11100600 | 1.04968400  | H    | 3.42582500  | -1.97539300 | 0.72952900  |
| H    | -0.63085300 | 0.12164600  | 1.70480700  | H    | 3.71015600  | -1.64890300 | -0.99771400 |
| H    | -0.02879600 | 3.65883200  | -0.21250500 | C    | -0.73542200 | -2.83694400 | 1.39850000  |
| H    | -2.44833500 | 3.98292800  | -0.01603800 | H    | -1.14210600 | -2.38321700 | 2.31672900  |
| N    | 1.19590900  | 1.34271100  | 0.13980800  | H    | -1.10532500 | -3.86161800 | 1.34025000  |
| H    | 1.77070700  | 2.13233900  | -0.12424700 | H    | 0.34866800  | -2.86199300 | 1.48745100  |
| C    | 1.79081800  | 0.06174700  | 0.11802400  | C    | -2.54822000 | -2.37642200 | -0.16428200 |
| C    | 0.97263700  | -1.02413900 | -0.00369800 | H    | -2.84669100 | -1.76513700 | -1.01061500 |
| C    | -0.49866000 | -0.91424300 | -0.12095200 | H    | -2.64556000 | -3.42501400 | -0.45656000 |
| N    | 3.15292100  | 0.03835600  | 0.17976700  | H    | -3.23422300 | -2.20415700 | 0.67617400  |
| N    | -1.15227100 | -2.12395100 | 0.19159800  | Cl   | -0.90472500 | -0.47855100 | -1.98001200 |

**Cartesians coordinates for the optimized structure of TS<sup>‡</sup><sub>trans-5</sub>**

(E = -1130.480688; H = -1130.462213; G = -1130.525523)

| atom | x           | y           | z           | atom | x           | y           | z           |
|------|-------------|-------------|-------------|------|-------------|-------------|-------------|
| C    | 2.84738900  | 1.97676400  | -0.50878400 | C    | -3.99449700 | 1.25663600  | 0.09888700  |
| C    | 2.26053100  | 0.87414100  | -1.06545600 | H    | -4.52343300 | 1.23161300  | 1.06157200  |
| C    | 0.84932600  | 0.65060700  | -0.93871200 | H    | -3.38498300 | 2.15362200  | 0.04967800  |
| C    | 0.04220600  | 1.63062700  | -0.25450900 | H    | -4.74207600 | 1.27960800  | -0.70103500 |
| C    | 0.68525100  | 2.79910300  | 0.26052100  | C    | -3.80070400 | -1.19512000 | 0.01272400  |
| C    | 2.04122600  | 2.95407200  | 0.14556600  | H    | -4.75470500 | -1.13000600 | -0.51764900 |
| H    | 3.91596300  | 2.13724200  | -0.59586800 | H    | -3.18359300 | -1.95640500 | -0.46551900 |
| H    | 2.84917400  | 0.16130100  | -1.63311500 | H    | -4.01089200 | -1.51418600 | 1.04446800  |
| H    | 0.35614600  | 0.17025000  | -1.77253700 | C    | 1.14690600  | -0.57838000 | 2.26423900  |
| H    | 0.06834700  | 3.53962100  | 0.75611500  | H    | 1.21790000  | -1.15424000 | 3.19075400  |
| H    | 2.51627100  | 3.83826600  | 0.55788100  | H    | 1.97771600  | 0.13724500  | 2.22713200  |
| N    | -1.25898900 | 1.44254100  | -0.06021500 | H    | 0.20768800  | -0.03283000 | 2.26332700  |
| C    | -1.76567400 | 0.19092100  | -0.01804700 | C    | 2.46743100  | -2.19845500 | 1.00309800  |
| C    | -1.00023300 | -0.95955500 | 0.28089500  | H    | 2.35963700  | -3.10508400 | 0.41458800  |
| C    | 0.39325400  | -1.15870000 | 0.04599300  | H    | 3.24224500  | -1.56739300 | 0.54825600  |
| N    | -3.13662400 | 0.09132200  | -0.05368600 | H    | 2.79166000  | -2.47258500 | 2.00840500  |
| N    | 1.19549800  | -1.49078600 | 1.11701100  | Cl   | 0.81712300  | -2.22473900 | -1.43615400 |
| H    | -1.42782200 | -1.65297800 | 0.99790900  |      |             |             |             |

**Cartesians coordinates for the optimized structure of TS<sup>‡</sup><sub>cis-5</sub>**

(E = -1130.481235; H = -1130.461861; G = -1130.528435)

| atom | x           | y           | z           | atom | x           | y           | z           |
|------|-------------|-------------|-------------|------|-------------|-------------|-------------|
| C    | -2.87398600 | -1.93644700 | -0.66514800 | C    | 3.97064700  | -1.37565500 | -0.12404300 |
| C    | -2.25049400 | -0.87406200 | -1.26974000 | H    | 4.75720400  | -1.29470000 | -0.88049200 |
| C    | -0.85774300 | -0.66139200 | -1.09418900 | H    | 4.44386600  | -1.52527400 | 0.85519000  |
| C    | -0.08610800 | -1.60062700 | -0.34641400 | H    | 3.33994700  | -2.23184000 | -0.34207600 |
| C    | -0.75290800 | -2.71701700 | 0.22583500  | C    | 3.86692500  | 1.07587900  | 0.09230800  |
| C    | -2.10946500 | -2.86456700 | 0.08464900  | H    | 4.84672400  | 1.00863900  | -0.38547900 |
| H    | -3.94021300 | -2.08970900 | -0.78349700 | H    | 3.32772200  | 1.91125900  | -0.35632800 |
| H    | -2.81525900 | -0.20101200 | -1.90549200 | H    | 4.02394900  | 1.29212900  | 1.15839900  |
| H    | -0.33279300 | -0.05460500 | -1.82342400 | C    | -0.41331000 | 3.12155100  | -1.21815400 |
| H    | -0.16093700 | -3.42070400 | 0.79751700  | H    | -0.71115300 | 2.93867700  | -2.25703500 |
| H    | -2.60871000 | -3.70560000 | 0.55321100  | H    | -0.76319800 | 4.11561800  | -0.92750400 |
| N    | 1.23665100  | -1.44727100 | -0.15232300 | H    | 0.66826500  | 3.06611800  | -1.14028200 |
| C    | 1.78528000  | -0.24717600 | -0.07556600 | C    | -2.46819600 | 2.26922500  | -0.16796800 |
| C    | 1.04738900  | 0.96002000  | 0.19937500  | H    | -2.86888000 | 1.39855600  | 0.33803100  |
| C    | -0.32605200 | 1.10808200  | 0.14425400  | H    | -2.67762900 | 3.15541300  | 0.43653000  |
| N    | 3.15497100  | -0.16834700 | -0.13199700 | H    | -2.92661400 | 2.39285200  | -1.15414100 |
| N    | -1.01951100 | 2.12439600  | -0.32879500 | Cl   | -1.28906200 | 0.61758900  | 2.14632200  |
| H    | 1.51511300  | 1.63683000  | 0.91001200  |      |             |             |             |

**Cartesians coordinates for the optimized structure of TS<sup>‡</sup><sub>trans-5-H</sub>**

(E = -1130.876393; H = -1130.858126; G = -1130.920627)

| atom | x           | y           | z           | atom | x           | y           | z           |
|------|-------------|-------------|-------------|------|-------------|-------------|-------------|
| C    | 3.01873300  | 1.75673400  | -0.54252900 | H    | -1.62979800 | -1.92678200 | -0.09564300 |
| C    | 2.34063200  | 0.69382300  | -1.06925900 | C    | -3.84906600 | 1.30073200  | -0.66825900 |
| C    | 0.91937500  | 0.52270300  | -0.85271700 | H    | -4.11235100 | 0.88555100  | -1.64916000 |
| C    | 0.23759100  | 1.55465500  | -0.09671700 | H    | -4.76370700 | 1.60303400  | -0.15731500 |
| C    | 0.95401700  | 2.64769500  | 0.42210800  | H    | -3.23448000 | 2.18441700  | -0.83038500 |
| C    | 2.31195100  | 2.74072300  | 0.19365300  | C    | -3.91982700 | -0.90661200 | 0.39782600  |
| H    | 4.08197400  | 1.87388500  | -0.70866900 | H    | -4.93060200 | -0.61548900 | 0.68305700  |
| H    | 2.84668400  | -0.03217900 | -1.69433100 | H    | -3.98370400 | -1.54962700 | -0.49081200 |
| H    | 0.37699800  | 0.23883600  | -1.75259400 | H    | -3.48222000 | -1.47517000 | 1.21873300  |
| H    | 0.43688700  | 3.41594100  | 0.98614900  | C    | 0.60675200  | -0.74555200 | 2.31087000  |
| H    | 2.85310800  | 3.59193400  | 0.59106500  | H    | -0.47047300 | -0.60560300 | 2.32168000  |
| N    | -1.09378900 | 1.41678000  | 0.11073800  | H    | 0.88715100  | -1.34532000 | 3.17614900  |
| H    | -1.55650400 | 2.11352600  | 0.68084500  | H    | 1.10474500  | 0.23084400  | 2.38711500  |
| C    | -1.77727500 | 0.17545300  | 0.01888300  | C    | 2.40818500  | -1.91732400 | 1.11369400  |
| C    | -1.09413800 | -0.98999800 | -0.05768500 | H    | 2.53888600  | -1.77292700 | 0.45703800  |
| C    | 0.39253200  | -1.13237800 | -0.08226900 | H    | 3.09217600  | -1.11676800 | 0.80006100  |
| N    | -3.14266900 | 0.30600700  | 0.15623800  | H    | 2.66012000  | -2.21383500 | 2.13010000  |
| N    | 1.01965500  | -1.45236500 | 1.09593800  | Cl   | 0.85329200  | -2.26947900 | -1.41876900 |

**Cartesians coordinates for the optimized structure of TS<sup>‡</sup><sub>cis-5-H</sub>**

(E = -1130.877825; H = -1130.859428; G = -1130.922243)

| atom | x           | y           | z           | atom | x           | y           | z           |
|------|-------------|-------------|-------------|------|-------------|-------------|-------------|
| C    | 2.95613500  | 1.83837400  | -0.52948600 | H    | -1.51782100 | -1.94301800 | 0.17941700  |
| C    | 2.34271200  | 0.71989600  | -1.00700500 | C    | -3.92597300 | 1.12038100  | -0.75125900 |
| C    | 0.91801500  | 0.49691800  | -0.83334000 | H    | -4.23771400 | 0.62398500  | -1.67856500 |
| C    | 0.15967100  | 1.58131400  | -0.23410900 | H    | -4.81606000 | 1.45369400  | -0.21612400 |
| C    | 0.80826400  | 2.74345300  | 0.21498900  | H    | -3.33413600 | 1.99288900  | -1.02093000 |
| C    | 2.17464200  | 2.85465500  | 0.08257000  | C    | -3.88199000 | -1.01244200 | 0.47006700  |
| H    | 4.02247000  | 1.98218400  | -0.64670700 | H    | -4.90196700 | -0.73739200 | 0.73785700  |
| H    | 2.91048200  | -0.01763500 | -1.56063500 | H    | -3.92593800 | -1.73794800 | -0.35369500 |
| H    | 0.43705200  | 0.07899100  | -1.71886700 | H    | -3.41509200 | -1.47941800 | 1.33726700  |
| H    | 0.23425600  | 3.53669200  | 0.68033300  | C    | 0.65418100  | -2.69949400 | -1.55082400 |
| H    | 2.66653400  | 3.74840500  | 0.44931300  | H    | 1.13899300  | -2.20062800 | -2.40230200 |
| N    | -1.17074500 | 1.41119200  | -0.04570600 | H    | 0.92811600  | -3.75401400 | -1.57004400 |
| H    | -1.65938600 | 2.13629700  | 0.46474000  | H    | -0.42272000 | -2.61074800 | -1.67115300 |
| C    | -1.79361100 | 0.13897300  | -0.00449000 | C    | 2.44722800  | -2.43761600 | 0.14743500  |
| C    | -1.03696700 | -0.98618200 | 0.04584900  | H    | 2.45896700  | -2.79283100 | 1.17735300  |
| C    | 0.44224600  | -0.99015600 | 0.17995000  | H    | 2.83619200  | -3.21940300 | -0.50154700 |
| N    | -3.15914400 | 0.20169000  | 0.10310200  | H    | 3.10493000  | -1.56446500 | 0.08149900  |
| N    | 1.07860300  | -2.12110100 | -0.27430200 | Cl   | 0.98026700  | -0.59685600 | 1.90406200  |

### Cartesians coordinates for the optimized structure of (1Z-3E)-4

(in "dichloromethane", using the default polarizable continuum model)

(E = -1130.547191; H = -1130.527813; G = -1130.595172)

| atom | x           | y           | z           | atom | x           | y           | z           |
|------|-------------|-------------|-------------|------|-------------|-------------|-------------|
| C    | 4.00510200  | 0.69867300  | -0.27468400 | C    | -1.16065600 | -3.76576500 | -0.12415600 |
| C    | 3.69532900  | 0.05744400  | 0.92574800  | H    | -1.88640700 | -4.43925800 | -0.58444800 |
| C    | 2.53955500  | -0.70812900 | 1.04032300  | H    | -0.17857100 | -3.92847200 | -0.56277300 |
| C    | 1.64770200  | -0.84159100 | -0.03918400 | H    | -1.09666700 | -3.99755200 | 0.94703200  |
| C    | 1.97790800  | -0.20129100 | -1.24876800 | C    | -3.01777900 | -2.15994100 | -0.22334600 |
| C    | 3.14110800  | 0.55645700  | -1.36048700 | H    | -3.36936900 | -2.43666900 | 0.77939400  |
| H    | 4.90984500  | 1.28875200  | -0.36587400 | H    | -3.25074500 | -1.11130200 | -0.38865900 |
| H    | 4.36097100  | 0.14955800  | 1.77758800  | H    | -3.56315600 | -2.76232400 | -0.95493000 |
| H    | 2.30360900  | -1.21748600 | 1.96778200  | C    | -1.34530900 | 2.60641900  | -1.73396800 |
| H    | 1.32668600  | -0.32226600 | -2.10658400 | H    | -2.27676800 | 2.26384700  | -2.20714100 |
| H    | 3.37637400  | 1.03382300  | -2.30622600 | H    | -1.24771600 | 3.67878200  | -1.90787200 |
| N    | 0.55098300  | -1.69303100 | 0.10318300  | H    | -0.50322100 | 2.09597700  | -2.20071700 |
| C    | -0.65558900 | -1.38317400 | -0.25333800 | C    | -2.19807900 | 3.26971900  | 0.46921500  |
| C    | -1.13478000 | -0.02785200 | -0.63278900 | H    | -3.25750100 | 3.10022000  | 0.23339800  |
| C    | -1.11645200 | 1.08183000  | 0.12761100  | H    | -2.04945500 | 3.12774500  | 1.53635200  |
| N    | -1.58429000 | -2.39192800 | -0.35873800 | H    | -1.94487300 | 4.30062800  | 0.21813800  |
| N    | -1.32742200 | 2.37054000  | -0.29302000 | Cl   | -0.69718900 | 0.94190100  | 1.85674600  |
| H    | -1.54409600 | 0.06782100  | -1.63218200 |      |             |             |             |

### Cartesians coordinates for the optimized structure of (1E-3E)-4

(in "dichloromethane", using the default polarizable continuum model)

(E = -1130.546726; H = -1130.527411; G = -1130.593532)

| atom | x           | y           | z           | atom | x           | y           | z           |
|------|-------------|-------------|-------------|------|-------------|-------------|-------------|
| C    | 3.65981500  | -1.29077900 | -0.49033100 | C    | -3.01878500 | -2.54519300 | -0.00017400 |
| C    | 3.13245000  | -1.66972900 | 0.74458000  | H    | -3.98780900 | -2.79546300 | -0.43680900 |
| C    | 1.75514900  | -1.73396100 | 0.93520800  | H    | -2.24732300 | -3.18081100 | -0.42868200 |
| C    | 0.86044400  | -1.40053700 | -0.09874100 | H    | -3.06024400 | -2.74011200 | 1.07948900  |
| C    | 1.40659200  | -1.03903700 | -1.34662000 | C    | -3.85958000 | -0.24313300 | -0.15211500 |
| C    | 2.78468500  | -0.98549900 | -1.53368200 | H    | -4.27421700 | -0.28444100 | 0.86391400  |
| H    | 4.73228500  | -1.24931400 | -0.64211700 | H    | -3.56226300 | 0.78218500  | -0.35621100 |
| H    | 3.79689500  | -1.92721300 | 1.56277500  | H    | -4.64874100 | -0.52627300 | -0.85379500 |
| H    | 1.34676100  | -2.05247900 | 1.88779300  | C    | -0.58276900 | 0.95633700  | 2.22537100  |
| H    | 0.74064200  | -0.81484900 | -2.17116300 | H    | -0.28448000 | -0.08788300 | 2.36122300  |
| H    | 3.17797500  | -0.70833100 | -2.50632600 | H    | -0.37334500 | 1.50798700  | 3.14469200  |
| N    | -0.50665800 | -1.56418300 | 0.12650800  | H    | -1.65454400 | 0.99122900  | 2.03031800  |
| C    | -1.41843400 | -0.71789600 | -0.24951700 | C    | 1.49361000  | 2.04572000  | 1.43702500  |
| C    | -1.18502200 | 0.67179400  | -0.71225300 | H    | 2.12514100  | 1.18796200  | 1.68858700  |
| C    | -0.36787100 | 1.56943700  | -0.12629400 | H    | 1.92724100  | 2.55591000  | 0.58157600  |
| N    | -2.72396500 | -1.14803700 | -0.28882900 | H    | 1.47360600  | 2.73388300  | 2.28631800  |
| N    | 0.13340900  | 1.60351900  | 1.13013300  | Cl   | 0.01081300  | 3.04080800  | -1.12007200 |
| H    | -1.69262200 | 0.97004700  | -1.61978500 |      |             |             |             |

### Cartesians coordinates for the optimized structure of (1E-2E-3E)-4•H

(in "dichloromethane", using the default polarizable continuum model)

(E = -1130.994685; H = -1130.975435; G = -1131.041251)

| atom | x           | y           | z           | atom | x           | y           | z           |
|------|-------------|-------------|-------------|------|-------------|-------------|-------------|
| C    | 3.49104600  | -1.61373000 | -0.65815500 | H    | -1.87556300 | 1.17443200  | -1.34232600 |
| C    | 3.05674700  | -1.94786900 | 0.62251400  | C    | -3.13478400 | -2.41251500 | -0.07727800 |
| C    | 1.70919700  | -1.83994100 | 0.95764000  | H    | -4.00820300 | -2.58616000 | -0.70574800 |
| C    | 0.78579400  | -1.40565500 | 0.00339300  | H    | -2.30580500 | -2.99819000 | -0.47038600 |
| C    | 1.21252300  | -1.09423900 | -1.29056600 | H    | -3.36956800 | -2.73967400 | 0.94002000  |
| C    | 2.56381100  | -1.18893800 | -1.60959800 | C    | -3.97198500 | -0.08451400 | -0.21056100 |
| H    | 4.54002700  | -1.69270700 | -0.91687600 | H    | -4.74496400 | -0.44428800 | 0.47033100  |
| H    | 3.76484500  | -2.29033300 | 1.36772300  | H    | -3.69097400 | 0.92466700  | 0.07830500  |
| H    | 1.37380000  | -2.10059600 | 1.95515500  | H    | -4.37373100 | -0.07676800 | -1.22721900 |
| H    | 0.49717200  | -0.79025600 | -2.04325400 | C    | -0.22084200 | 1.08492100  | 2.27815700  |
| H    | 2.88881100  | -0.94561200 | -2.61431100 | H    | 0.18594100  | 0.10569000  | 2.53649100  |
| N    | -0.59318300 | -1.36907500 | 0.36894200  | H    | -0.01768600 | 1.77823200  | 3.09588500  |
| H    | -0.89721700 | -2.12914000 | 0.96206300  | H    | -1.29705000 | 1.00876900  | 2.13831800  |
| C    | -1.55830400 | -0.51854100 | -0.07269000 | C    | 1.70216900  | 2.27733100  | 1.27300800  |
| C    | -1.26753500 | 0.80581800  | -0.52982900 | H    | 2.27257600  | 2.30472500  | 0.34954000  |
| C    | -0.24589600 | 1.62485800  | -0.10209000 | H    | 1.56391700  | 3.29399300  | 1.65057700  |
| N    | -2.81511200 | -0.98133500 | -0.11960400 | H    | 2.25691900  | 1.69586300  | 2.00859600  |
| N    | 0.40287600  | 1.62287600  | 1.06387500  | Cl   | 0.20841400  | 2.91048100  | -1.23112000 |

### Cartesians coordinates for the optimized structure of (1Z-2Z-3E)-4•H

(in "dichloromethane", using the default polarizable continuum model)

(E = -1130.997848; H = -1130.979370; G = -1131.043902)

| atom | x           | y           | z           | atom | x           | y           | z           |
|------|-------------|-------------|-------------|------|-------------|-------------|-------------|
| C    | -4.21958200 | -1.52622300 | -0.42293800 | H    | -0.05158700 | -0.69407700 | 1.20878500  |
| C    | -4.36789400 | -0.58455900 | 0.59343400  | C    | 0.32466200  | 3.57764500  | -0.34922000 |
| C    | -3.37538000 | 0.36595100  | 0.81935200  | H    | 1.14734800  | 4.11050200  | -0.82515600 |
| C    | -2.23339600 | 0.38012700  | 0.01582100  | H    | -0.43399200 | 3.36822900  | -1.10143300 |
| C    | -2.08895000 | -0.54782900 | -1.01877600 | H    | -0.09499100 | 4.21872200  | 0.43305700  |
| C    | -3.07887100 | -1.50397400 | -1.22522600 | C    | 2.19060600  | 2.43516700  | 0.78926600  |
| H    | -4.99043200 | -2.26800400 | -0.59430300 | H    | 2.21321100  | 3.31210300  | 1.44029200  |
| H    | -5.25292900 | -0.59076100 | 1.21849900  | H    | 2.41970200  | 1.55254700  | 1.37900300  |
| H    | -3.48072900 | 1.09134600  | 1.61808500  | H    | 2.94024900  | 2.55661600  | 0.00539400  |
| H    | -1.21699500 | -0.51432100 | -1.65933800 | C    | 1.73927200  | -2.39281400 | 1.78031400  |
| H    | -2.96429400 | -2.22320100 | -2.02764200 | H    | 0.79178300  | -2.92954300 | 1.66721200  |
| N    | -1.25627000 | 1.39632300  | 0.23849500  | H    | 2.49117100  | -3.08599000 | 2.15408100  |
| H    | -1.62514500 | 2.31614000  | 0.43737000  | H    | 1.61346900  | -1.58344900 | 2.49868400  |
| C    | 0.08641400  | 1.23008800  | 0.32357300  | C    | 3.04185000  | -2.77680900 | -0.28380400 |
| C    | 0.59142200  | -0.08285700 | 0.59051100  | H    | 3.30193200  | -2.34574700 | -1.24362500 |
| C    | 1.69270500  | -0.70501600 | 0.04702400  | H    | 3.95659400  | -2.99436700 | 0.27082900  |
| N    | 0.85072700  | 2.32573800  | 0.20550700  | H    | 2.49607200  | -3.70969300 | -0.44852700 |
| N    | 2.20769500  | -1.85748100 | 0.49765700  | Cl   | 2.48866800  | 0.00867700  | -1.35169900 |

### Cartesians coordinates for the optimized structure of (1Z-2E-3E)-4•H

(in "dichloromethane", using the default polarizable continuum model)

(E = -1130.996972; H = -1130.977537; G = -1131.044418)

| atom | x           | y           | z           | atom | x          | y           | z           |
|------|-------------|-------------|-------------|------|------------|-------------|-------------|
| C    | -3.97594600 | 0.06274000  | 0.65016400  | H    | 2.11353800 | 0.21585600  | 1.15278200  |
| C    | -3.76499000 | -0.52364300 | -0.59611800 | C    | 1.59209200 | -3.62245100 | 0.15849700  |
| C    | -2.51687400 | -1.04504100 | -0.92541500 | H    | 2.31548400 | -4.13192600 | 0.79486100  |
| C    | -1.47396800 | -0.99268800 | 0.00271200  | H    | 0.60065400 | -3.75326200 | 0.58854100  |
| C    | -1.68650200 | -0.42800500 | 1.26291000  | H    | 1.62536600 | -4.07688000 | -0.83623500 |
| C    | -2.93304700 | 0.10695600  | 1.57477200  | C    | 3.38081500 | -1.90827500 | 0.12849200  |
| H    | -4.94597100 | 0.47383500  | 0.90265100  | H    | 3.89298200 | -2.64901400 | -0.48704200 |
| H    | -4.56958800 | -0.57031700 | -1.32039300 | H    | 3.57052100 | -0.91980100 | -0.28163300 |
| H    | -2.34828900 | -1.48682400 | -1.90113100 | H    | 3.77384400 | -1.96480100 | 1.14739300  |
| H    | -0.89062700 | -0.41681500 | 1.99599200  | C    | 1.57086500 | 2.61983000  | 1.69767600  |
| H    | -3.09266300 | 0.54341100  | 2.55380900  | H    | 2.65777000 | 2.51535500  | 1.77502400  |
| N    | -0.23141100 | -1.59361500 | -0.34881900 | H    | 1.28772100 | 3.60656800  | 2.06075900  |
| H    | -0.30872900 | -2.42872800 | -0.91268900 | H    | 1.08831400 | 1.86361600  | 2.31492000  |
| C    | 1.02099600  | -1.22904600 | 0.02764100  | C    | 1.08678200 | 3.76295400  | -0.43759800 |
| C    | 1.37708600  | 0.11315200  | 0.36900800  | H    | 0.88217700 | 3.59124100  | -1.48801700 |
| C    | 0.94694800  | 1.28248600  | -0.22346800 | H    | 0.31295400 | 4.41093700  | -0.02091600 |
| N    | 1.94360400  | -2.19941000 | 0.10838600  | H    | 2.05544400 | 4.25917400  | -0.34046600 |
| N    | 1.12041800  | 2.49894700  | 0.30666900  | Cl   | 0.14148700 | 1.22253500  | -1.78220600 |

### Cartesians coordinates for the optimized structure of (1E-2Z-3E)-4•H

(in "dichloromethane", using the default polarizable continuum model)

(E = -1130.994103; H = -1130.974983; G = -1131.040832)

| atom | x           | y           | z           | atom | x           | y           | z           |
|------|-------------|-------------|-------------|------|-------------|-------------|-------------|
| C    | 4.49557700  | -1.33634800 | 0.37765300  | H    | 0.23062200  | -0.90669300 | -1.15928300 |
| C    | 4.57145300  | -0.30668400 | -0.55847100 | C    | -0.49549200 | 3.37608500  | 0.27533200  |
| C    | 3.48718900  | 0.54362800  | -0.75577400 | H    | -1.37311500 | 3.87850800  | 0.67983500  |
| C    | 2.32240100  | 0.37066400  | -0.00336600 | H    | 0.22648500  | 3.24473900  | 1.08015100  |
| C    | 2.24757000  | -0.64859800 | 0.94888700  | H    | -0.06731100 | 4.00990100  | -0.50857200 |
| C    | 3.33156900  | -1.50371600 | 1.12633600  | C    | -2.21781500 | 2.07220100  | -0.93113900 |
| H    | 5.33862000  | -2.00016100 | 0.52672200  | H    | -2.30857800 | 3.00105600  | -1.49649900 |
| H    | 5.47224700  | -0.16646500 | -1.14395700 | H    | -2.28217400 | 1.23671200  | -1.62234700 |
| H    | 3.53917100  | 1.33565900  | -1.49445000 | H    | -3.03987700 | 2.01926900  | -0.21407600 |
| H    | 1.35847700  | -0.76891400 | 1.55302300  | C    | -2.08944100 | 0.13738400  | 1.90419600  |
| H    | 3.26862400  | -2.29394200 | 1.86498300  | H    | -2.36549800 | 1.19348700  | 1.86521500  |
| N    | 1.25606400  | 1.29939500  | -0.19618400 | H    | -2.57026300 | -0.31823900 | 2.77079800  |
| H    | 1.55005100  | 2.24874000  | -0.38026600 | H    | -1.01129200 | 0.05132000  | 2.01633400  |
| C    | -0.06499400 | 1.03252300  | -0.32791500 | C    | -3.91917200 | -1.06699600 | 0.74511700  |
| C    | -0.48027300 | -0.30726400 | -0.60946000 | H    | -4.29983800 | -1.22584600 | -0.25969300 |
| C    | -1.66624000 | -0.91242300 | -0.26295500 | H    | -3.99187100 | -1.99651300 | 1.31593400  |
| N    | -0.91600600 | 2.07270800  | -0.25295700 | H    | -4.52587700 | -0.30323200 | 1.23082500  |
| N    | -2.52954800 | -0.58852500 | 0.70691700  | Cl   | -2.05624500 | -2.37806900 | -1.17645500 |

### Cartesians coordinates for the optimized structure of *trans*-5

(in "dichloromethane", using the default polarizable continuum model)

(E = -1130.572776; H = -1130.553791; G = -1130.619657)

| atom | x           | y           | z           | atom | x           | y           | z           |
|------|-------------|-------------|-------------|------|-------------|-------------|-------------|
| C    | 2.61606100  | 1.55899000  | 1.54372800  | C    | -3.90763700 | 1.55466300  | -0.47751300 |
| C    | 2.11130000  | 0.34454500  | 1.25760400  | H    | -4.68597700 | 1.73217100  | 0.26918500  |
| C    | 0.91561400  | 0.20557600  | 0.36659400  | H    | -3.19799800 | 2.37351500  | -0.46645100 |
| C    | 0.05849400  | 1.43445700  | 0.31438800  | H    | -4.37478600 | 1.48508100  | -1.46334800 |
| C    | 0.72477700  | 2.69811500  | 0.50019000  | C    | -4.03634400 | -0.90865400 | -0.17534200 |
| C    | 1.94650500  | 2.75322700  | 1.08876000  | H    | -5.07011500 | -0.62144000 | -0.35156600 |
| H    | 3.52041600  | 1.65194900  | 2.13236300  | H    | -3.72859900 | -1.59747800 | -0.96698700 |
| H    | 2.60734300  | -0.54809000 | 1.60859200  | H    | -3.98048100 | -1.42255500 | 0.78732100  |
| H    | 1.37952700  | 0.23997500  | -0.69360100 | C    | 0.00076800  | -3.48122300 | 0.78303900  |
| H    | 0.16889000  | 3.59360600  | 0.25263900  | H    | -0.46301600 | -3.85253300 | -0.13822400 |
| H    | 2.40866300  | 3.71561200  | 1.27745400  | H    | 0.68089200  | -4.24376600 | 1.16061800  |
| N    | -1.22438600 | 1.43920400  | 0.07482900  | H    | -0.77198300 | -3.31019900 | 1.53233300  |
| C    | -1.89111900 | 0.24138200  | 0.06100900  | C    | 2.14992400  | -2.50004300 | 0.11014900  |
| C    | -1.24613000 | -0.99979100 | 0.28411900  | H    | 2.56254000  | -1.63617400 | -0.40199800 |
| C    | 0.13202500  | -1.07538200 | 0.40892600  | H    | 2.78694800  | -2.78336100 | 0.95242300  |
| N    | -3.21303800 | 0.30049800  | -0.17609100 | H    | 2.14002900  | -3.32424000 | -0.60730800 |
| N    | 0.76862000  | -2.25839700 | 0.55044300  | Cl   | 2.24015300  | 0.18398500  | -2.62845500 |
| H    | -1.82869000 | -1.90412900 | 0.26210100  |      |             |             |             |

### Cartesians coordinates for the optimized structure of *cis*-5

(in "dichloromethane", using the default polarizable continuum model)

(E = -1130.559316; H = -1130.540292; G = -1130.606166)

| atom | x           | y           | z           | atom | x           | y           | z           |
|------|-------------|-------------|-------------|------|-------------|-------------|-------------|
| C    | -2.86753000 | -1.65975000 | -1.07094100 | C    | 3.88769900  | -1.49779700 | 0.34212900  |
| C    | -2.26750900 | -0.47395200 | -1.27365700 | H    | 4.41766400  | -1.34465200 | 1.28609400  |
| C    | -0.80333500 | -0.29067600 | -1.02786000 | H    | 3.18440200  | -2.31579100 | 0.44601100  |
| C    | -0.09107900 | -1.47133400 | -0.40863400 | H    | 4.61748200  | -1.73414200 | -0.43634800 |
| C    | -0.81483800 | -2.69732100 | -0.23152600 | C    | 3.98111600  | 0.93904000  | -0.08920400 |
| C    | -2.13517400 | -2.78054900 | -0.53226000 | H    | 5.00826600  | 0.65102000  | -0.30742400 |
| H    | -3.91258600 | -1.79073100 | -1.32318000 | H    | 3.62778800  | 1.59026900  | -0.88885600 |
| H    | -2.80719600 | 0.33799600  | -1.73932400 | H    | 3.96725200  | 1.48991700  | 0.85692000  |
| H    | -0.39725900 | -0.28714500 | -2.06295000 | C    | -0.22582600 | 3.46718900  | -0.58106900 |
| H    | -0.26887900 | -3.53628200 | 0.18070200  | H    | -0.92060400 | 4.22058000  | -0.95190900 |
| H    | -2.66341600 | -3.71274400 | -0.36844000 | H    | 0.10820400  | 3.76350600  | 0.41928500  |
| N    | 1.17414700  | -1.43073300 | -0.09433200 | H    | 0.63110700  | 3.42419700  | -1.25252800 |
| C    | 1.83338300  | -0.23173000 | -0.16035500 | C    | -2.33066300 | 2.27046100  | -0.15152800 |
| C    | 1.14321800  | 1.00423500  | -0.26932000 | H    | -2.66147700 | 1.34287800  | 0.30312800  |
| C    | -0.21452000 | 1.03401300  | -0.53604000 | H    | -2.40296200 | 3.04202100  | 0.61742300  |
| N    | 3.16821000  | -0.27294100 | -0.01460900 | H    | -2.96989900 | 2.55405700  | -0.99198600 |
| N    | -0.92052300 | 2.17764600  | -0.56085300 | Cl   | -1.57222200 | 0.08283100  | 2.75375400  |
| H    | 1.64740500  | 1.90814400  | 0.02970600  |      |             |             |             |

### Cartesians coordinates for the optimized structure of *trans*-5•H

(in "dichloromethane", using the default polarizable continuum model)

(E = -1130.937068; H = -1130.918974; G = -1130.980660)

| atom | x           | y           | z           | atom | x           | y           | z           |
|------|-------------|-------------|-------------|------|-------------|-------------|-------------|
| C    | 2.99036900  | 1.78129100  | -0.55021900 | H    | -1.51379600 | -1.97869300 | 0.02584500  |
| C    | 2.42972500  | 0.57773000  | -0.80360100 | C    | -3.89311500 | 1.36491000  | 0.21393200  |
| C    | 0.96553100  | 0.35702800  | -0.68655900 | H    | -4.93665500 | 1.22631100  | -0.05928700 |
| C    | 0.19338100  | 1.52270200  | -0.17130400 | H    | -3.84126600 | 1.51990900  | 1.29846300  |
| C    | 0.82510600  | 2.75860300  | 0.07582600  | H    | -3.55873500 | 2.26760000  | -0.30254500 |
| C    | 2.17854600  | 2.87413500  | -0.11072000 | C    | -3.87604800 | -1.07962600 | -0.27349000 |
| H    | 4.05363800  | 1.93381400  | -0.68089100 | H    | -4.90907300 | -0.87664100 | -0.54841700 |
| H    | 3.02185400  | -0.24828600 | -1.17437300 | H    | -3.44194600 | -1.73204900 | -1.03290100 |
| H    | 0.60002200  | 0.25551300  | -1.72480000 | H    | -3.86384100 | -1.60431800 | 0.69029800  |
| H    | 0.23693000  | 3.60385600  | 0.41178800  | C    | 0.47764000  | -0.68341700 | 2.36085100  |
| H    | 2.65206800  | 3.82962500  | 0.08197500  | H    | -0.60696500 | -0.61581600 | 2.34278700  |
| N    | -1.12001600 | 1.36798000  | -0.02087800 | H    | 0.77025500  | -1.21490100 | 3.26703700  |
| H    | -1.66297700 | 2.17584300  | 0.25472800  | H    | 0.90490900  | 0.33136500  | 2.41470600  |
| C    | -1.78268300 | 0.11902000  | -0.12078000 | C    | 2.40528600  | -1.71240200 | 1.32790200  |
| C    | -1.03839700 | -1.01778000 | -0.08283100 | H    | 2.74509600  | -2.35668300 | 0.52138200  |
| C    | 0.45351700  | -1.02122300 | -0.06047000 | H    | 3.00939900  | -0.79189600 | 1.33021500  |
| N    | -3.14658600 | 0.18440200  | -0.22901700 | H    | 2.57564500  | -2.22953300 | 2.27325500  |
| N    | 0.97446900  | -1.43727600 | 1.20443800  | Cl   | 0.99042500  | -2.31450500 | -1.34013500 |

### Cartesians coordinates for the optimized structure of *cis*-5•H

(in "dichloromethane", using the default polarizable continuum model)

(E = -1130.975810; H = -1130.956841; G = -1131.021387)

| atom | x           | y           | z           | atom | x           | y           | z           |
|------|-------------|-------------|-------------|------|-------------|-------------|-------------|
| C    | 3.09165400  | 1.40300200  | -0.89908000 | H    | -1.70095600 | -1.92570100 | -0.07231700 |
| C    | 2.45270300  | 0.22052600  | -1.02156000 | C    | -3.72794400 | 1.62161200  | 0.12366700  |
| C    | 0.97246400  | 0.12363000  | -0.87755900 | H    | -4.80543200 | 1.49123000  | 0.12239300  |
| C    | 0.32136900  | 1.35792300  | -0.35288600 | H    | -3.43107900 | 1.97834800  | 1.11377000  |
| C    | 1.03530000  | 2.56931400  | -0.25874300 | H    | -3.48411800 | 2.36756900  | -0.63642500 |
| C    | 2.37548400  | 2.58437100  | -0.52676000 | C    | -3.96909100 | -0.86059300 | -0.24763200 |
| H    | 4.15387900  | 1.47029100  | -1.09355700 | H    | -4.98238500 | -0.53563500 | -0.46778700 |
| H    | 2.98289100  | -0.65135100 | -1.37327400 | H    | -3.63905500 | -1.52402600 | -1.04693900 |
| H    | 0.65285200  | 0.13502500  | -1.94798900 | H    | -3.96834200 | -1.40231200 | 0.70233700  |
| H    | 0.51388700  | 3.47002900  | 0.04026000  | C    | 0.15739600  | -3.56752300 | -0.23927100 |
| H    | 2.91614900  | 3.51999400  | -0.45147900 | H    | 0.85628600  | -4.37307300 | -0.45763400 |
| N    | -1.01420000 | 1.34386200  | -0.22630500 | H    | -0.29673400 | -3.74982200 | 0.73919700  |
| H    | -1.46567500 | 2.21548400  | 0.02033800  | H    | -0.61157100 | -3.55823500 | -1.00978600 |
| C    | -1.77944500 | 0.18600800  | -0.26802000 | C    | 2.28076200  | -2.42792200 | 0.27128000  |
| C    | -1.12230300 | -1.05120700 | -0.31256600 | H    | 2.61686100  | -1.48856600 | 0.69747100  |
| C    | 0.26745700  | -1.14463000 | -0.39713200 | H    | 2.25469300  | -3.15867900 | 1.08073200  |
| N    | -3.10555300 | 0.32533100  | -0.18528800 | H    | 2.96441100  | -2.78779200 | -0.50055900 |
| N    | 0.90762800  | -2.30366800 | -0.24897200 | Cl   | 0.98961600  | 0.40361600  | 2.30604500  |



**Cartesians coordinates for the optimized structure of TS<sup>‡</sup><sub>trans-5</sub>***(in "dichloromethane", using the default polarizable continuum model)*

(E = -1130.487373; H = -1130.468663; G = -1130.532663)

| atom | x           | y           | z           | atom | x           | y           | z           |
|------|-------------|-------------|-------------|------|-------------|-------------|-------------|
| C    | 2.84520100  | 1.98466800  | -0.50253800 | C    | -4.00808000 | 1.24441500  | 0.08042500  |
| C    | 2.26107300  | 0.87726700  | -1.05344100 | H    | -4.49842700 | 1.24483700  | 1.06293400  |
| C    | 0.84944900  | 0.65115600  | -0.92799500 | H    | -3.41958700 | 2.14994900  | -0.02375200 |
| C    | 0.03767400  | 1.63382100  | -0.25179500 | H    | -4.78537000 | 1.22398800  | -0.68906400 |
| C    | 0.67815200  | 2.80587000  | 0.25791200  | C    | -3.79856700 | -1.20551600 | 0.03572500  |
| C    | 2.03504900  | 2.96346900  | 0.14448300  | H    | -4.76652200 | -1.14600400 | -0.46675600 |
| H    | 3.91380500  | 2.14561200  | -0.58519300 | H    | -3.19682800 | -1.97338700 | -0.45088300 |
| H    | 2.85409100  | 0.16167900  | -1.61270900 | H    | -3.97517300 | -1.50857200 | 1.07714600  |
| H    | 0.36045000  | 0.16942300  | -1.76365200 | C    | 1.13950700  | -0.59919000 | 2.28594400  |
| H    | 0.06297700  | 3.55009100  | 0.75073700  | H    | 1.21379800  | -1.19848000 | 3.19598800  |
| H    | 2.50705200  | 3.85003300  | 0.55472000  | H    | 1.96704100  | 0.11979600  | 2.26799000  |
| N    | -1.26702800 | 1.44787100  | -0.06425500 | H    | 0.19605000  | -0.06169800 | 2.29591500  |
| C    | -1.77092900 | 0.19139300  | -0.02178600 | C    | 2.47912700  | -2.18393600 | 0.99381900  |
| C    | -0.99936900 | -0.95685300 | 0.27707200  | H    | 2.37404300  | -3.09716900 | 0.41547300  |
| C    | 0.39449000  | -1.14211300 | 0.05853500  | H    | 3.24162200  | -1.54833900 | 0.52645300  |
| N    | -3.13833100 | 0.08428800  | -0.06653900 | H    | 2.81451600  | -2.44483000 | 1.99774200  |
| N    | 1.20066200  | -1.48414400 | 1.11460200  | Cl   | 0.83214800  | -2.22900600 | -1.45123400 |
| H    | -1.43383100 | -1.66663600 | 0.97307500  |      |             |             |             |

**Cartesians coordinates for the optimized structure of TS<sup>‡</sup><sub>cis-5</sub>***(in "dichloromethane", using the default polarizable continuum model)*

(E = -1130.525244; H = -1130.505251; G = -1130.576244)

| atom | x           | y           | z           | atom | x           | y           | z           |
|------|-------------|-------------|-------------|------|-------------|-------------|-------------|
| C    | 2.26392400  | 2.74141700  | -0.33153100 | C    | -4.23461400 | 0.60120700  | 0.65684000  |
| C    | 1.60824000  | 2.01387100  | -1.29757000 | H    | -5.06271000 | 0.70930000  | -0.04738900 |
| C    | 0.32738100  | 1.46293700  | -1.03196100 | H    | -4.62213600 | 0.19419500  | 1.59624900  |
| C    | -0.30644700 | 1.71192000  | 0.22073900  | H    | -3.78381400 | 1.57015400  | 0.84592200  |
| C    | 0.38507300  | 2.47911200  | 1.18912000  | C    | -3.70781400 | -1.63597300 | -0.25891600 |
| C    | 1.64328500  | 2.96924900  | 0.91782600  | H    | -4.72452900 | -1.54543300 | -0.64220300 |
| H    | 3.24163400  | 3.16270000  | -0.53091900 | H    | -3.09345800 | -2.07574200 | -1.04304100 |
| H    | 2.04623900  | 1.88463900  | -2.28055600 | H    | -3.72316900 | -2.30549400 | 0.60754200  |
| H    | -0.29621600 | 1.19330600  | -1.87854000 | C    | 1.08282300  | -2.06719800 | -2.67294800 |
| H    | -0.09568800 | 2.65571500  | 2.14306900  | H    | 1.63142500  | -1.56074400 | -3.47003900 |
| H    | 2.16650200  | 3.54402300  | 1.67333600  | H    | 1.48157300  | -3.07435900 | -2.54292100 |
| N    | -1.53999300 | 1.22507600  | 0.50369600  | H    | 0.02597100  | -2.11379500 | -2.92089800 |
| C    | -1.92956600 | 0.05618200  | 0.05832600  | C    | 2.64084800  | -1.12865600 | -0.93993900 |
| C    | -0.94386400 | -0.97073700 | -0.33742500 | H    | 2.63052800  | -0.89365100 | 0.12180100  |
| C    | 0.26706200  | -0.75472200 | -0.81606900 | H    | 3.17998700  | -2.06317600 | -1.09200400 |
| N    | -3.23130600 | -0.30117500 | 0.09504500  | H    | 3.12034600  | -0.33410700 | -1.51582000 |
| N    | 1.25910600  | -1.32268400 | -1.41007000 | Cl   | 2.17798500  | -2.29606900 | 2.62056200  |
| H    | -1.14085800 | -1.99454500 | -0.03280500 |      |             |             |             |

**Cartesians coordinates for the optimized structure of TS<sup>‡</sup><sub>trans-5-H</sub>***(in “dichloromethane”, using the default polarizable continuum model)*

(E = -1130.933357; H = -1130.915099; G = -1130.977488)

| atom | x           | y           | z           | atom | x           | y           | z           |
|------|-------------|-------------|-------------|------|-------------|-------------|-------------|
| C    | 3.01806800  | 1.74830200  | -0.54753800 | H    | -1.63578100 | -1.92692100 | -0.07943500 |
| C    | 2.33602800  | 0.69601100  | -1.09203800 | C    | -3.84821400 | 1.31246100  | -0.64923500 |
| C    | 0.91683000  | 0.53096400  | -0.87998400 | H    | -4.11310200 | 0.91594000  | -1.63766800 |
| C    | 0.23599500  | 1.55239000  | -0.11487900 | H    | -4.76196600 | 1.60201500  | -0.12929400 |
| C    | 0.95459500  | 2.63616100  | 0.41985900  | H    | -3.23376400 | 2.19847400  | -0.79260400 |
| C    | 2.31373500  | 2.72486700  | 0.19918200  | C    | -3.91503700 | -0.91296700 | 0.37828400  |
| H    | 4.08341200  | 1.85837400  | -0.70309600 | H    | -4.92766800 | -0.62506600 | 0.66020400  |
| H    | 2.84205500  | -0.02532200 | -1.72189200 | H    | -3.97267500 | -1.54832100 | -0.51638700 |
| H    | 0.36900700  | 0.22454200  | -1.76717000 | H    | -3.47886500 | -1.48860300 | 1.19496100  |
| H    | 0.43746100  | 3.39396500  | 0.99619400  | C    | 0.58998500  | -0.73816800 | 2.31989400  |
| H    | 2.85759600  | 3.56511600  | 0.61475200  | H    | -0.48913500 | -0.61683300 | 2.32534800  |
| N    | -1.09634300 | 1.41824200  | 0.09421300  | H    | 0.88130900  | -1.33628400 | 3.18221000  |
| H    | -1.54854500 | 2.11591800  | 0.67216000  | H    | 1.07085600  | 0.24533400  | 2.39574900  |
| C    | -1.77516700 | 0.17793100  | 0.01524000  | C    | 2.41874400  | -1.87221900 | 1.12104500  |
| C    | -1.09621400 | -0.99225100 | -0.05438700 | H    | 2.56197700  | -2.74090600 | 0.48440600  |
| C    | 0.38500000  | -1.13932900 | -0.06896200 | H    | 3.07974300  | -1.06504300 | 0.77994800  |
| N    | -3.14024500 | 0.30165100  | 0.15060000  | H    | 2.68298900  | -2.13549600 | 2.14291400  |
| N    | 1.02027700  | -1.43683900 | 1.10342400  | Cl   | 0.85901000  | -2.29042200 | -1.40105000 |

**Cartesians coordinates for the optimized structure of TS<sup>‡</sup><sub>cis-5-H</sub>***(in “dichloromethane”, using the default polarizable continuum model)*

(E = -1130.935631; H = -1130.917030; G = -1130.980379)

| atom | x           | y           | z           | atom | x           | y           | z           |
|------|-------------|-------------|-------------|------|-------------|-------------|-------------|
| C    | -2.97237800 | -1.81304900 | -0.54781200 | C    | 3.91156500  | -1.18000400 | -0.72462300 |
| C    | -2.34578400 | -0.70453000 | -1.03581200 | H    | 4.25104300  | -0.70361000 | -1.65212000 |
| C    | -0.92440200 | -0.50762100 | -0.87018100 | H    | 4.78330200  | -1.51972600 | -0.16393500 |
| C    | -0.17693400 | -1.58434800 | -0.26542400 | H    | 3.30864500  | -2.04441700 | -0.99139100 |
| C    | -0.83435900 | -2.74017000 | 0.19116900  | C    | 3.88101400  | 0.98307500  | 0.44188000  |
| C    | -2.20165200 | -2.83810500 | 0.06185700  | H    | 4.90627300  | 0.70426100  | 0.68280100  |
| H    | -4.04169400 | -1.94005600 | -0.65563100 | H    | 3.90292500  | 1.70644400  | -0.38387300 |
| H    | -2.90688300 | 0.04467600  | -1.57951100 | H    | 3.43817000  | 1.45414200  | 1.31936400  |
| H    | -0.43066300 | -0.04094400 | -1.72073100 | C    | -0.50813300 | 2.85335200  | -1.40640500 |
| H    | -0.26424000 | -3.53391600 | 0.65866000  | H    | -0.82523800 | 2.36906700  | -2.33903300 |
| H    | -2.70202200 | -3.72445000 | 0.43396600  | H    | -0.90220300 | 3.86930600  | -1.39364600 |
| N    | 1.15755600  | -1.42792600 | -0.07551300 | H    | 0.57664300  | 2.88630500  | -1.38123200 |
| H    | 1.63758600  | -2.17395500 | 0.41266800  | C    | -2.45937200 | 2.42338000  | 0.00709100  |
| C    | 1.78391500  | -0.16668100 | 0.00164000  | H    | -3.02511700 | 2.35389500  | -0.92682700 |
| C    | 1.04147500  | 0.97247000  | 0.09075000  | H    | -2.87271300 | 1.73335000  | 0.73396900  |
| C    | -0.42320300 | 1.01342700  | 0.20084600  | H    | -2.55487500 | 3.44080600  | 0.39275400  |
| N    | 3.14717000  | -0.22881000 | 0.09372900  | Cl   | -1.01699900 | 0.56206500  | 1.93980500  |
| N    | -1.04266600 | 2.14044000  | -0.24070600 |      |             |             |             |
| H    | 1.54511200  | 1.91062600  | 0.26463100  |      |             |             |             |
